# Supplementary material for: Identification of Key Candidate Genes in Dairy Cow in Response to Escherichia coli Mastitis by Bioinformatical Analysis
Source: PubMed Central journal article supplement (PMC6915111; doi:10.3389/fgene.2019.01251), 2019-12-06
Supplement: Presentation_1.pdf [file Presentation_1.pdf]

## Supplementary Material

Supplementary Figure 1

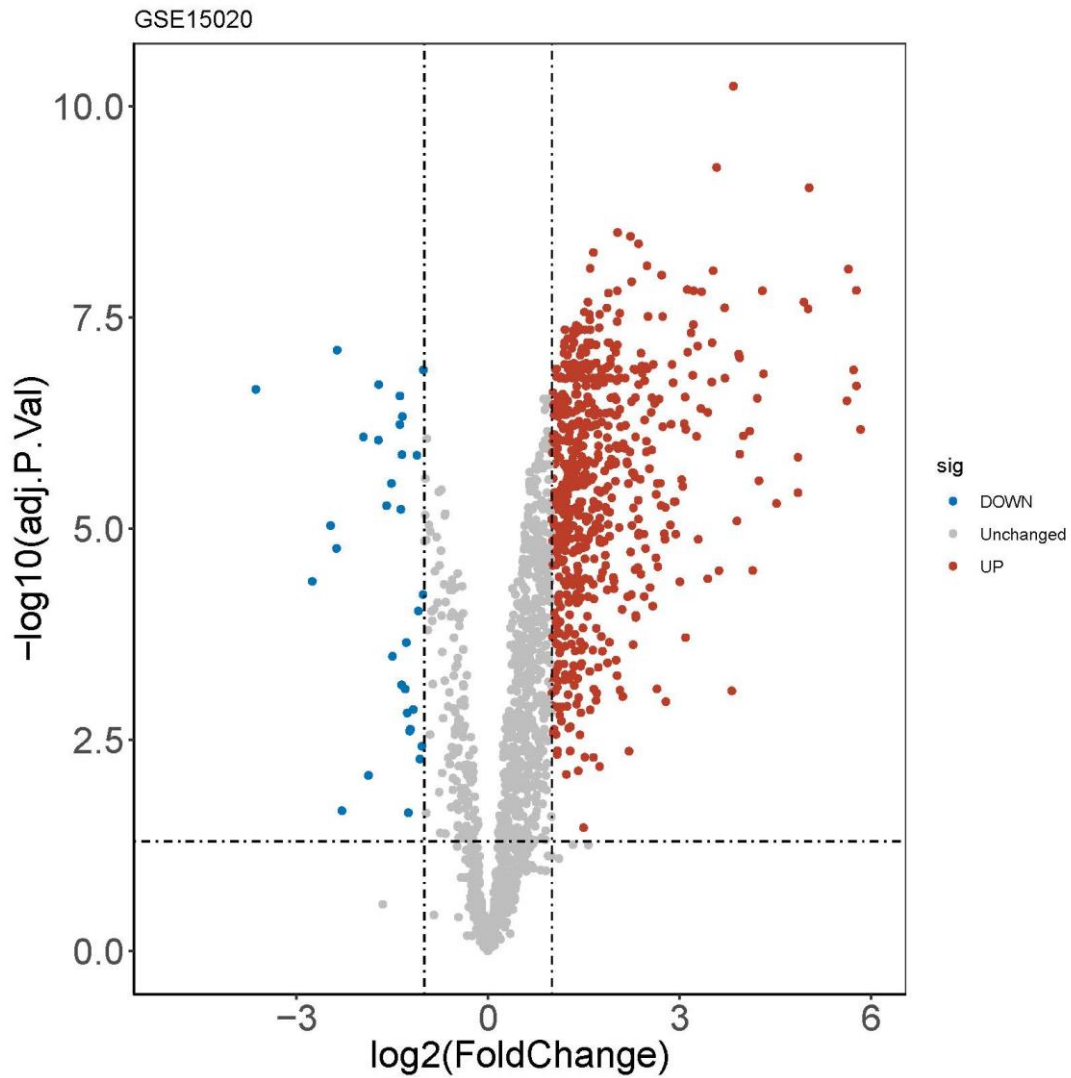

**Supplementary Figure 1A.** Volcano plot of the differentially expressed genes (DEGs) in GSE15020. The red and blue dots indicated significantly upregulated or downregulated expression of genes in mammary gland tissues with live *E. coli* infection compared to normal tissues.

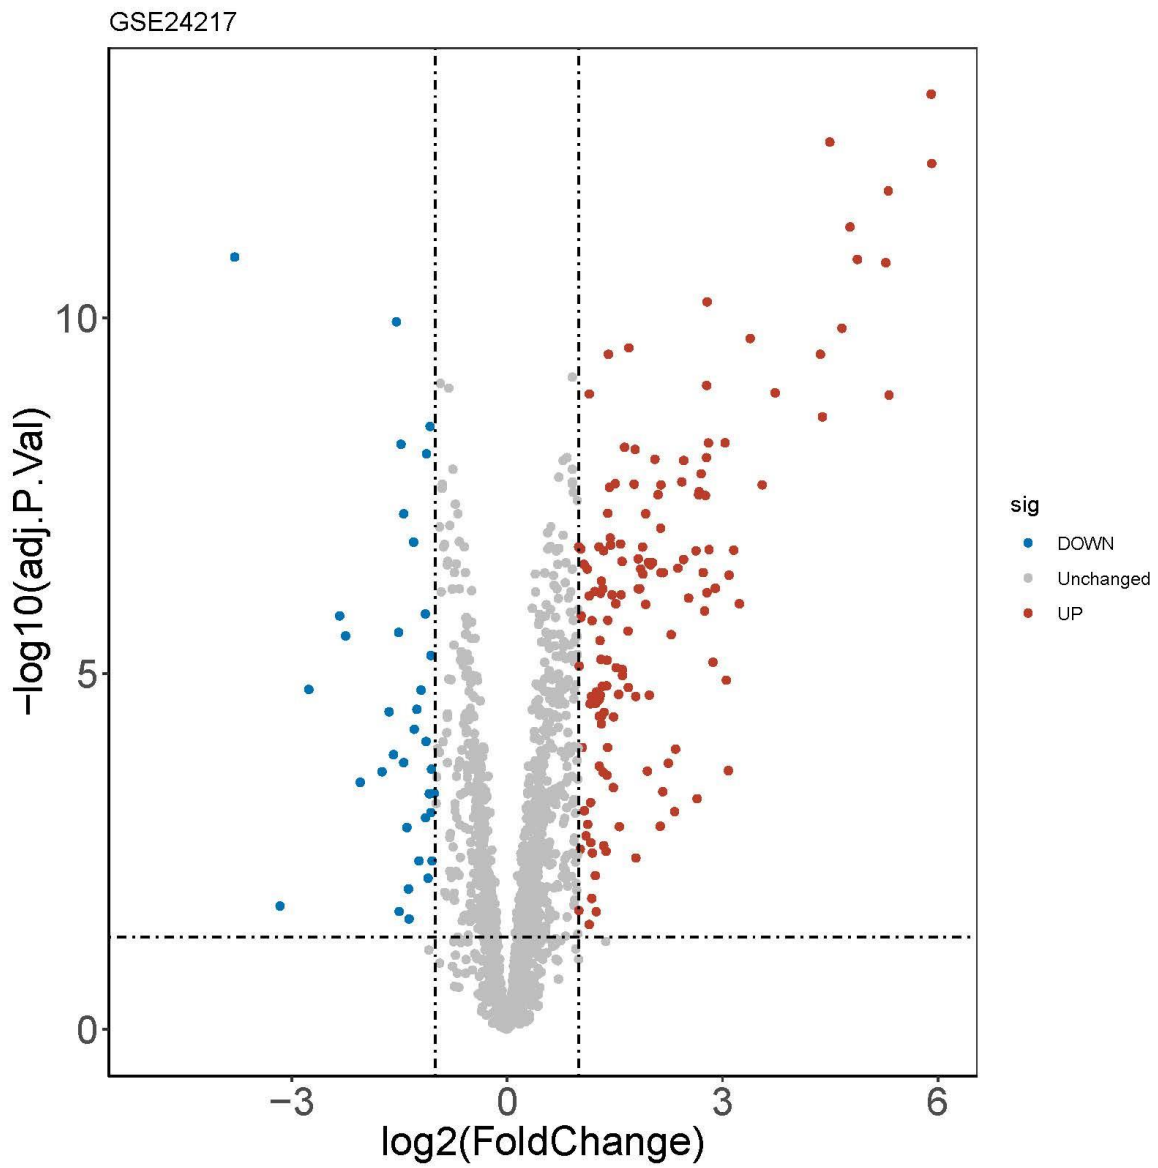

**Supplementary Figure 1B.** Volcano plot of the DEGs in GSE24217. The red and blue dots indicated significantly upregulated or downregulated expression of genes in mammary gland tissues with live *E. coli* infection compared to normal tissues.

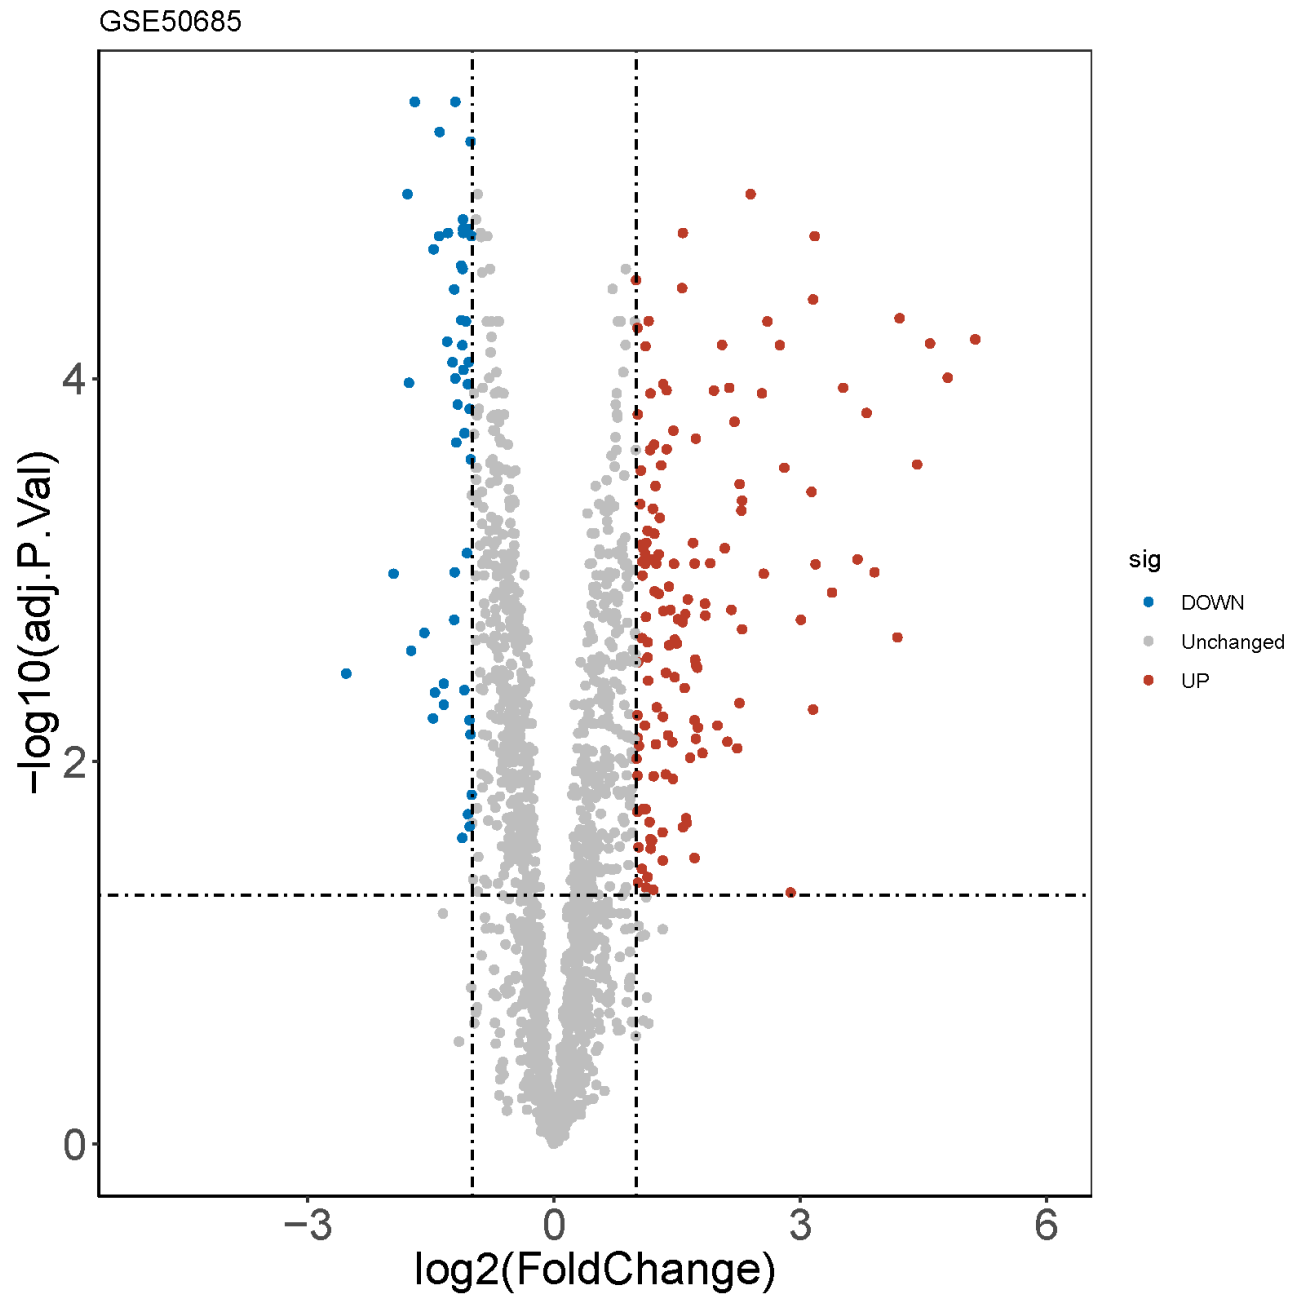

**Supplementary Figure 1C.** Volcano plot of the DEGs in GSE50685. The red and blue dots indicated significantly upregulated or downregulated expression of genes in mammary gland tissues with live *E. coli* infection compared to normal tissues.
